# Supplementary material for: A Pseudomonas aeruginosa TIR effector mediates immune evasion by targeting UBAP1 and TLR adaptors
Source: PubMed Central journal article supplement (PMC5494471; doi:10.15252/embj.201695343), 2017-05-08

Fig\_6A

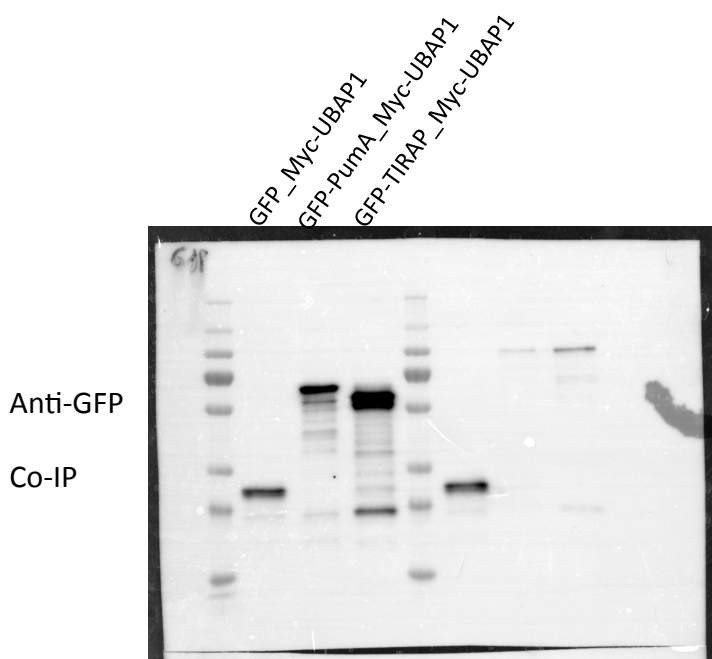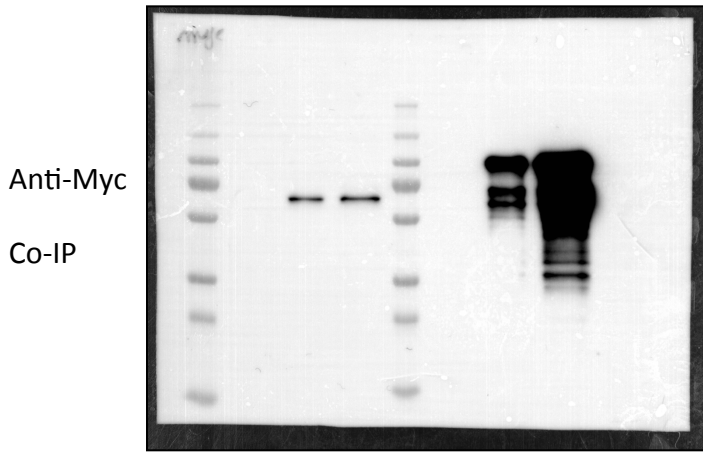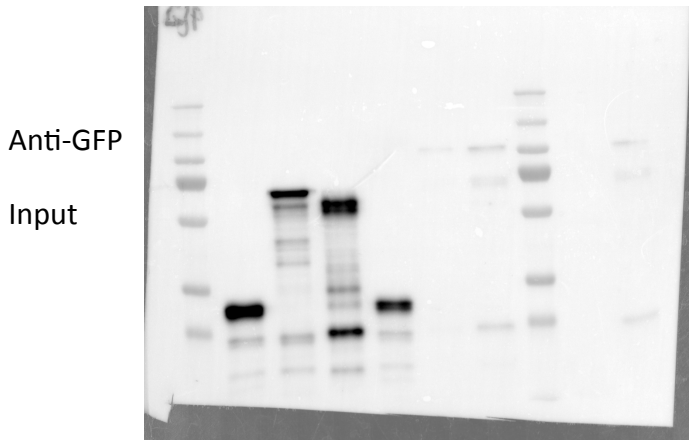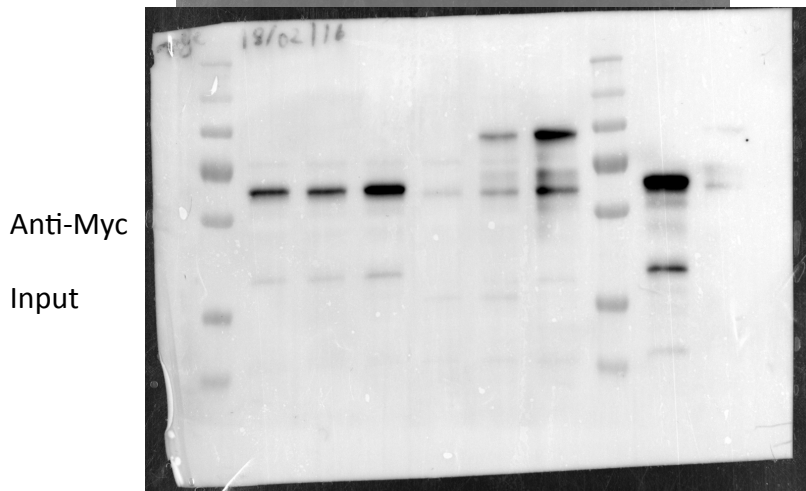

Fig\_6B

GFP - Strep-UBAP1  
GFP-Puma - Strep-UBAP1  
GFP-TIRAP - Strep-UBAP1

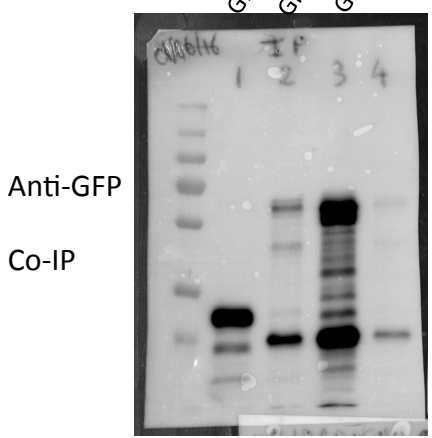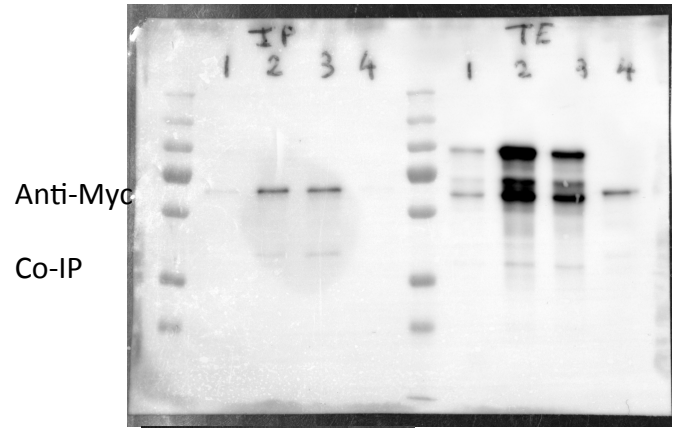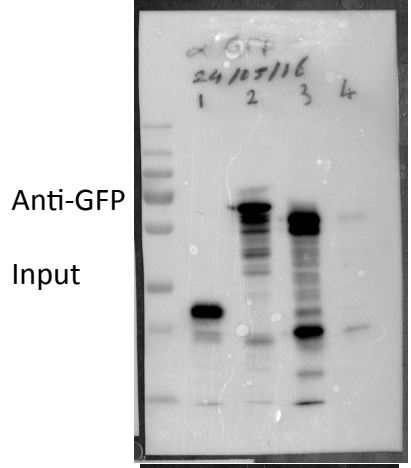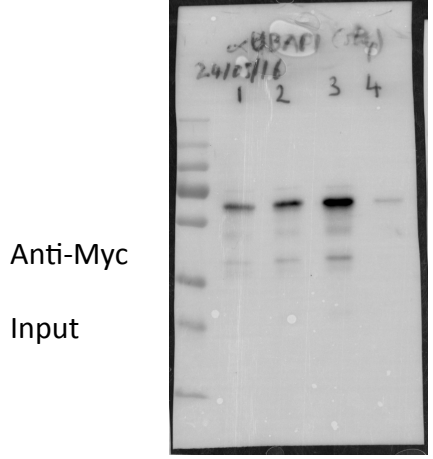

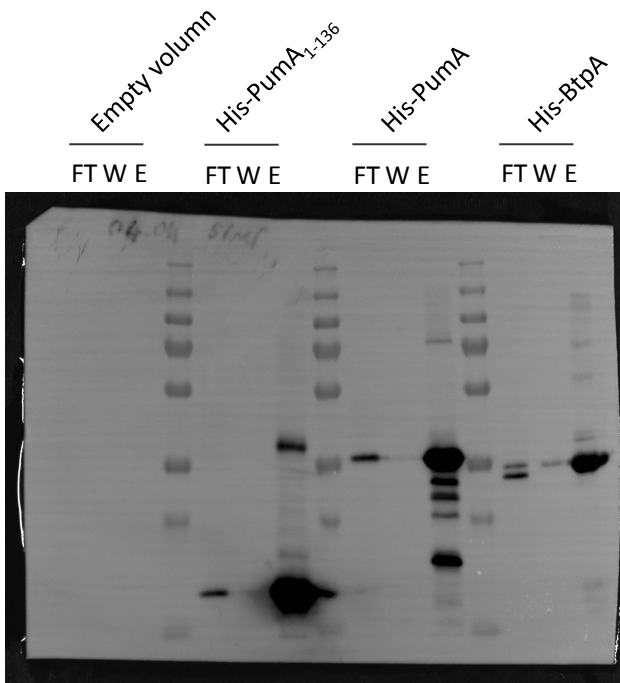

Fig6C :  $\alpha$ V5 Strep-UBAP1

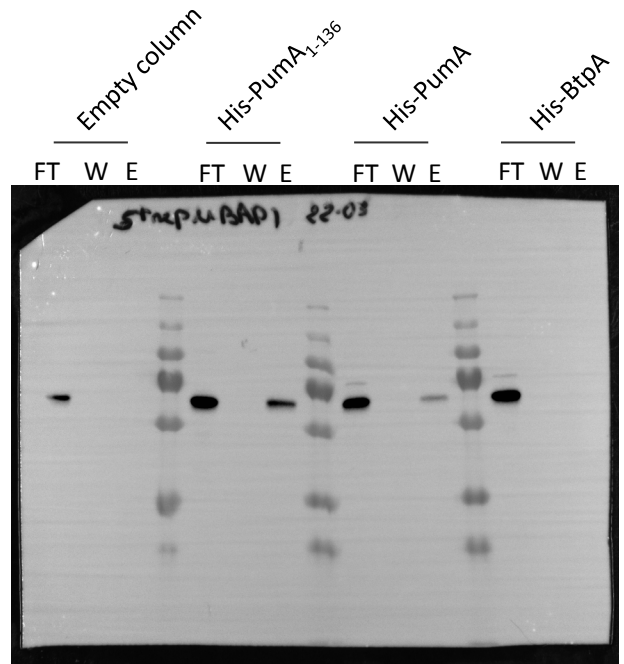

Fig6C :  $\alpha$ UBAP1 Strep-UBAP1

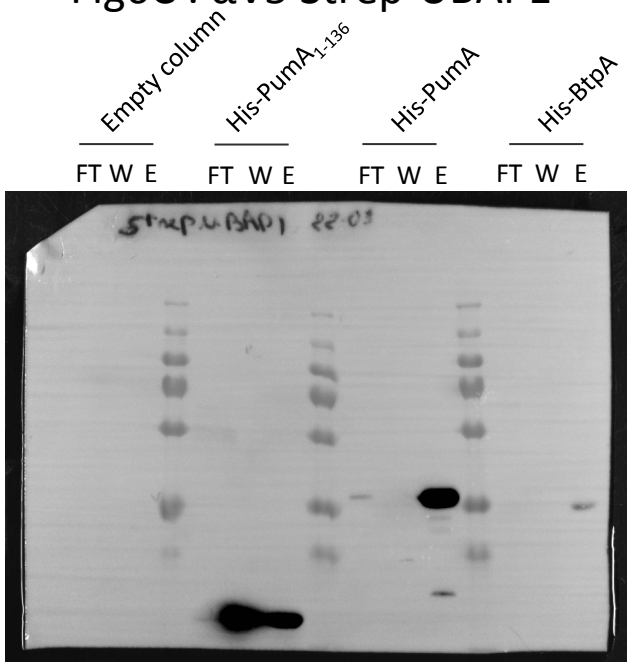

Fig6C :  $\alpha$ His Strep-UBAP1

Fig\_6D, E and F

HA-PumA<sub>137-303</sub> HA-PumA<sub>1-136</sub> HA-PumA  
FT W E FT W E FT W E

Anti-HA

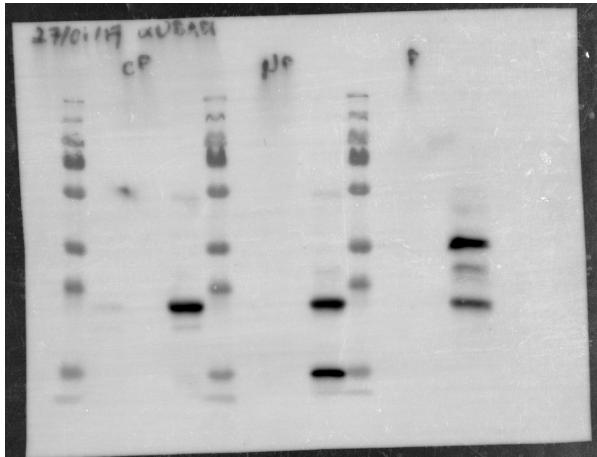

Anti-UBAP1

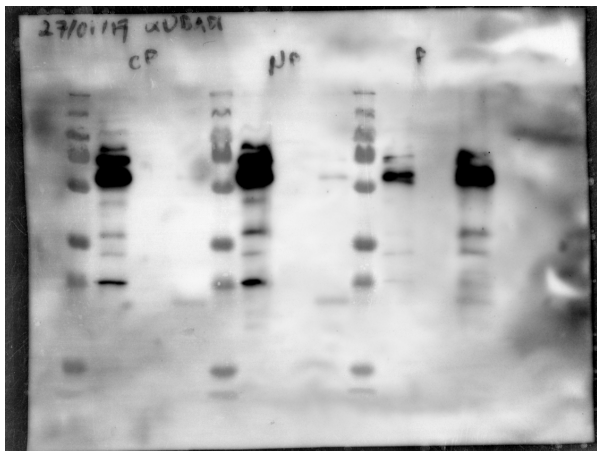

Anti-TIRAP

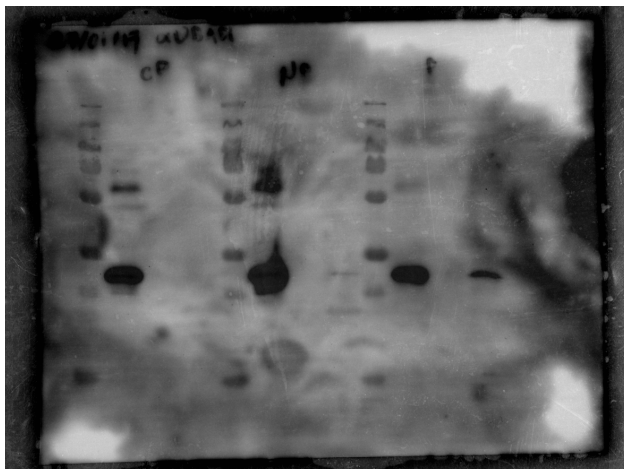

Anti-TSG101

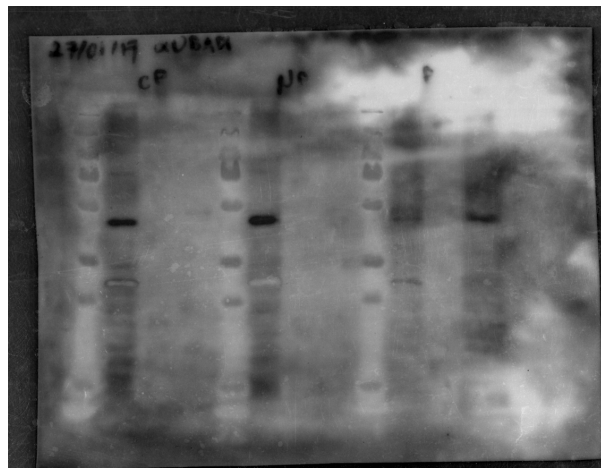

Supplement: EMBJ-36-1869-s005.pdf [file EMBJ-36-1869-s005.pdf]
