# Supplementary material for: A Pseudomonas aeruginosa TIR effector mediates immune evasion by targeting UBAP1 and TLR adaptors
Source: PubMed Central journal article supplement (PMC5494471; doi:10.15252/embj.201695343), 2017-05-08

Fig\_4C

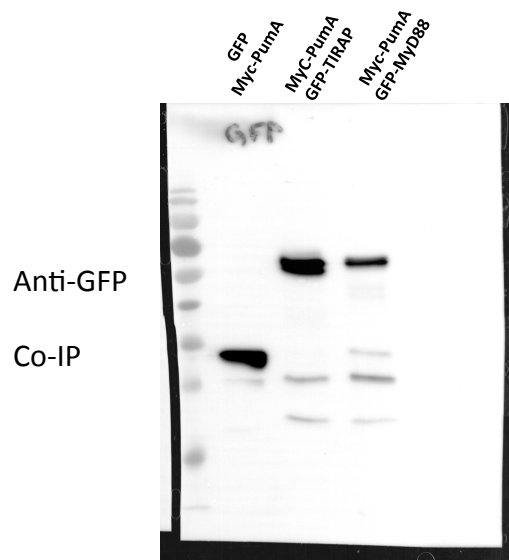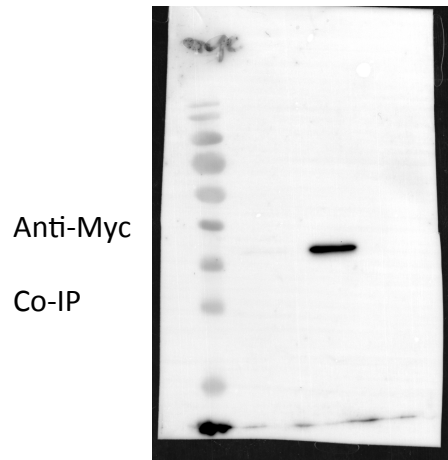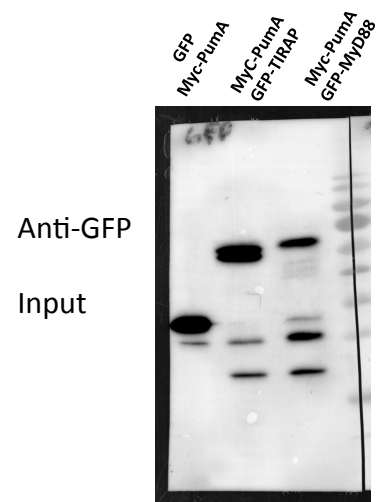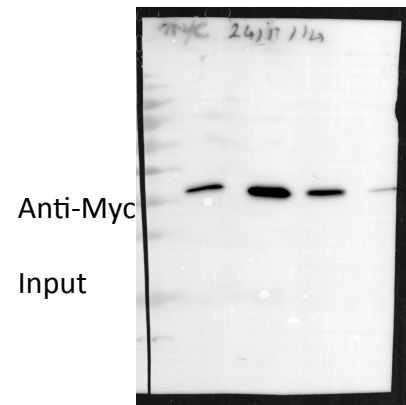

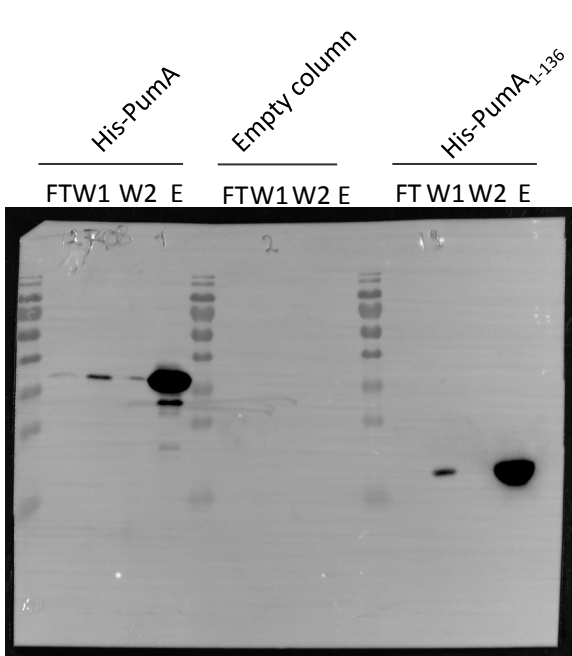

Fig4D :  $\alpha$ His HA-TIRAP

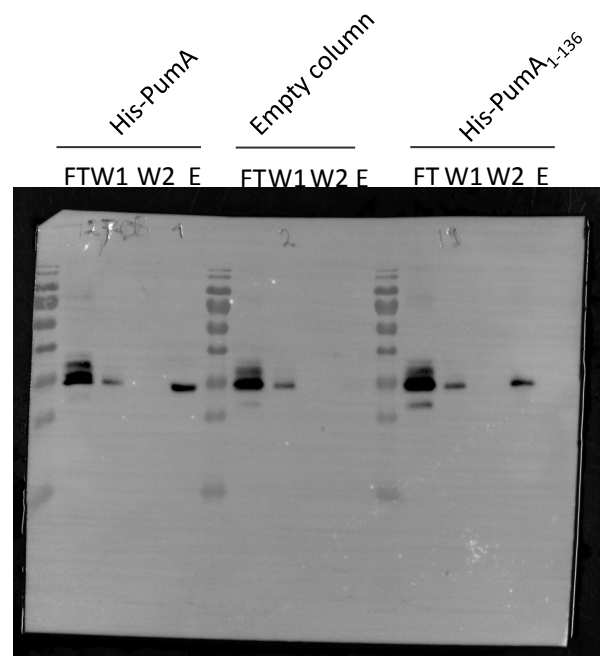

Fig4D :  $\alpha$ HA HA-TIRAP

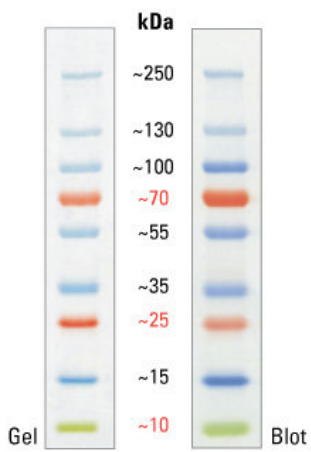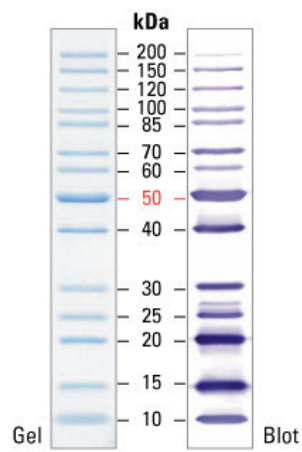

Supplement: EMBJ-36-1869-s003.pdf [file EMBJ-36-1869-s003.pdf]
