# Supplementary material for: A Pseudomonas aeruginosa TIR effector mediates immune evasion by targeting UBAP1 and TLR adaptors
Source: PubMed Central journal article supplement (PMC5494471; doi:10.15252/embj.201695343), 2017-05-08
Supplement: EMBJ-36-1869-s004.pdf [file EMBJ-36-1869-s004.pdf]

Fig\_5B

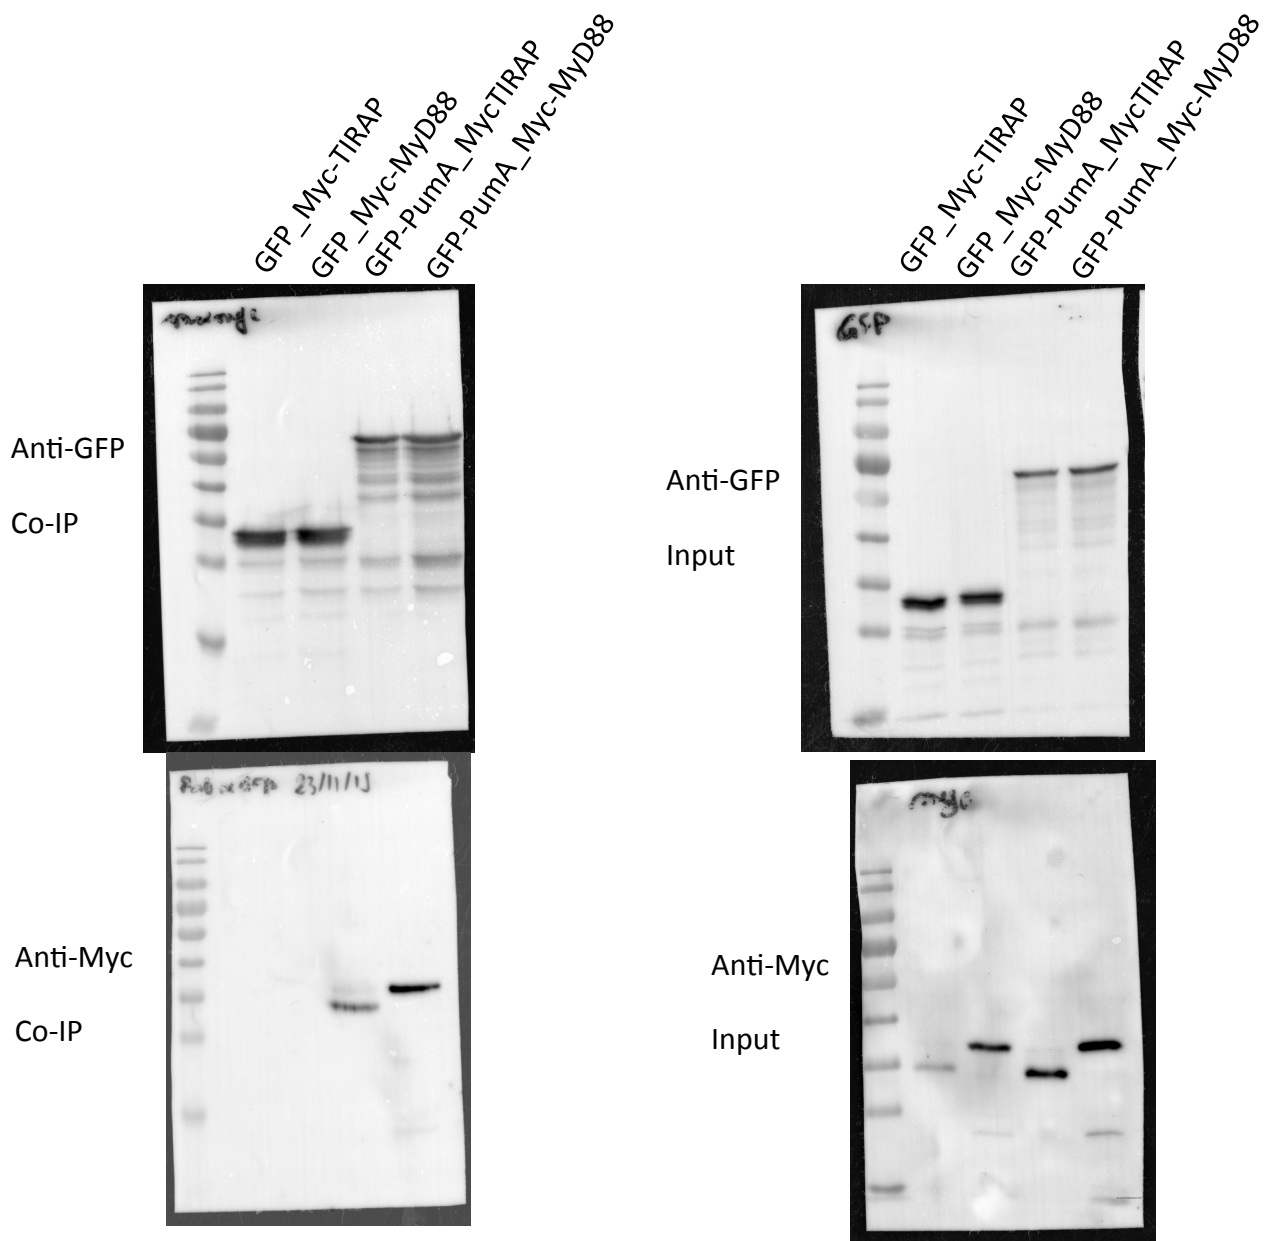

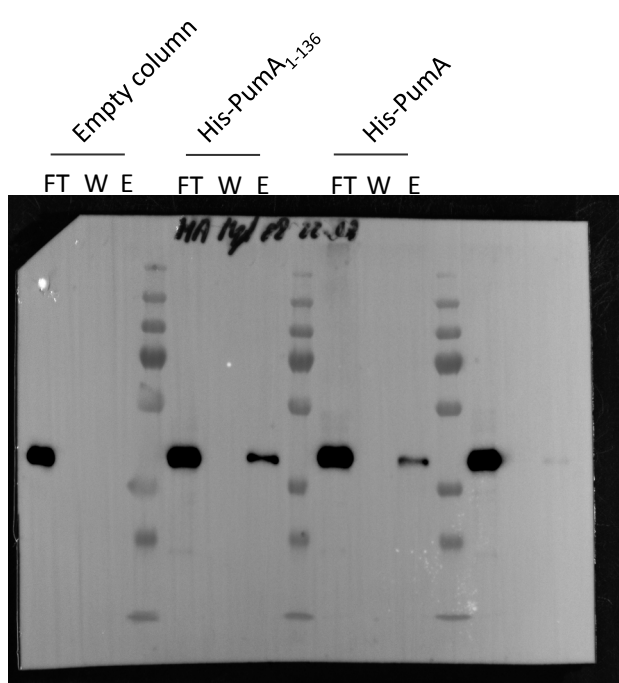

Fig5A :  $\alpha$ HA HA-Myd88

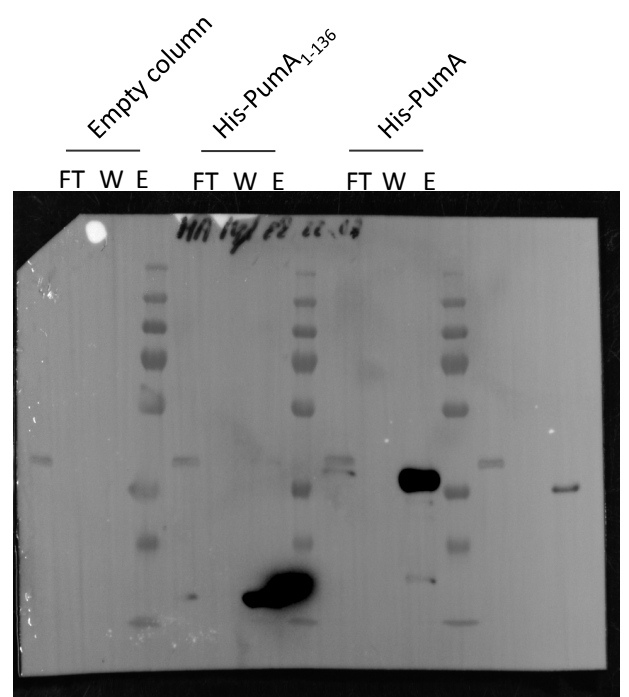

Fig5A :  $\alpha$ His HA-Myd88

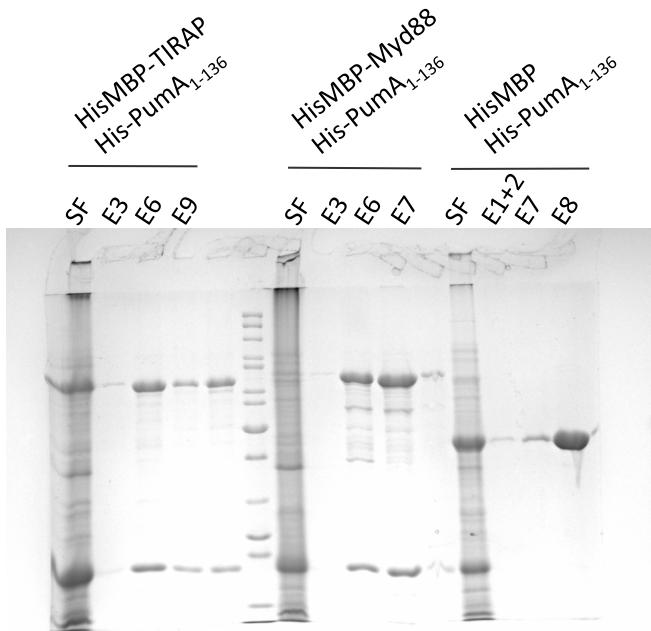

Fig5 D-E-C
