# Supplementary material for: A Pseudomonas aeruginosa TIR effector mediates immune evasion by targeting UBAP1 and TLR adaptors
Source: PubMed Central journal article supplement (PMC5494471; doi:10.15252/embj.201695343), 2017-05-08

Fig\_Fig7D and E

Ha-MyD88    Ha-TIRAP  
FT   W   E   FT   W   E

Anti-HA

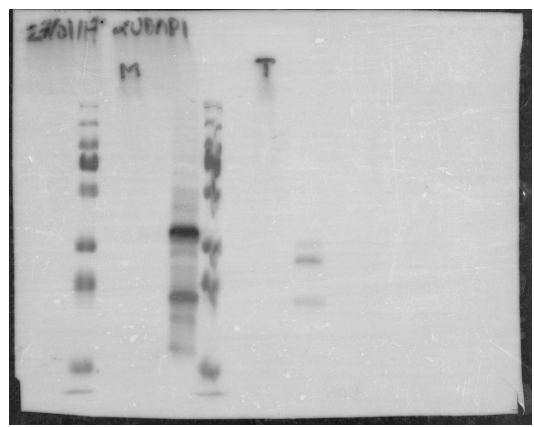

Anti-UBAP1

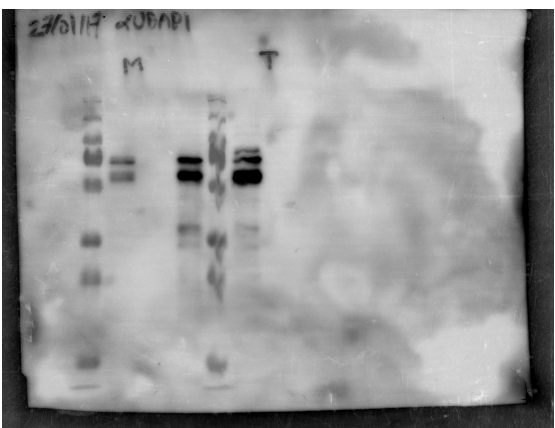

Anti-TIRAP

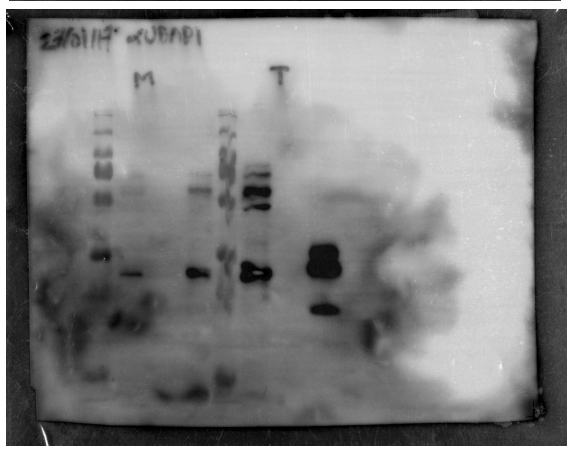

Anti-TSG101

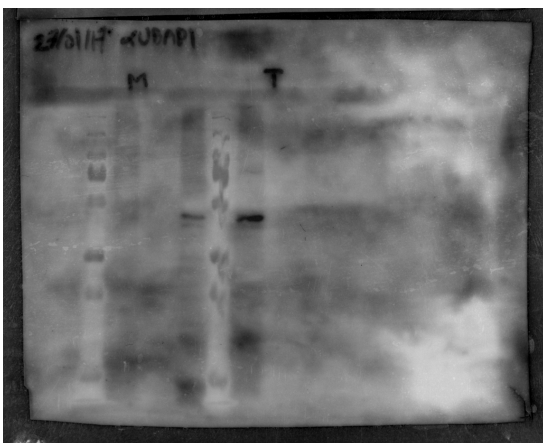

Fig\_Fig7F

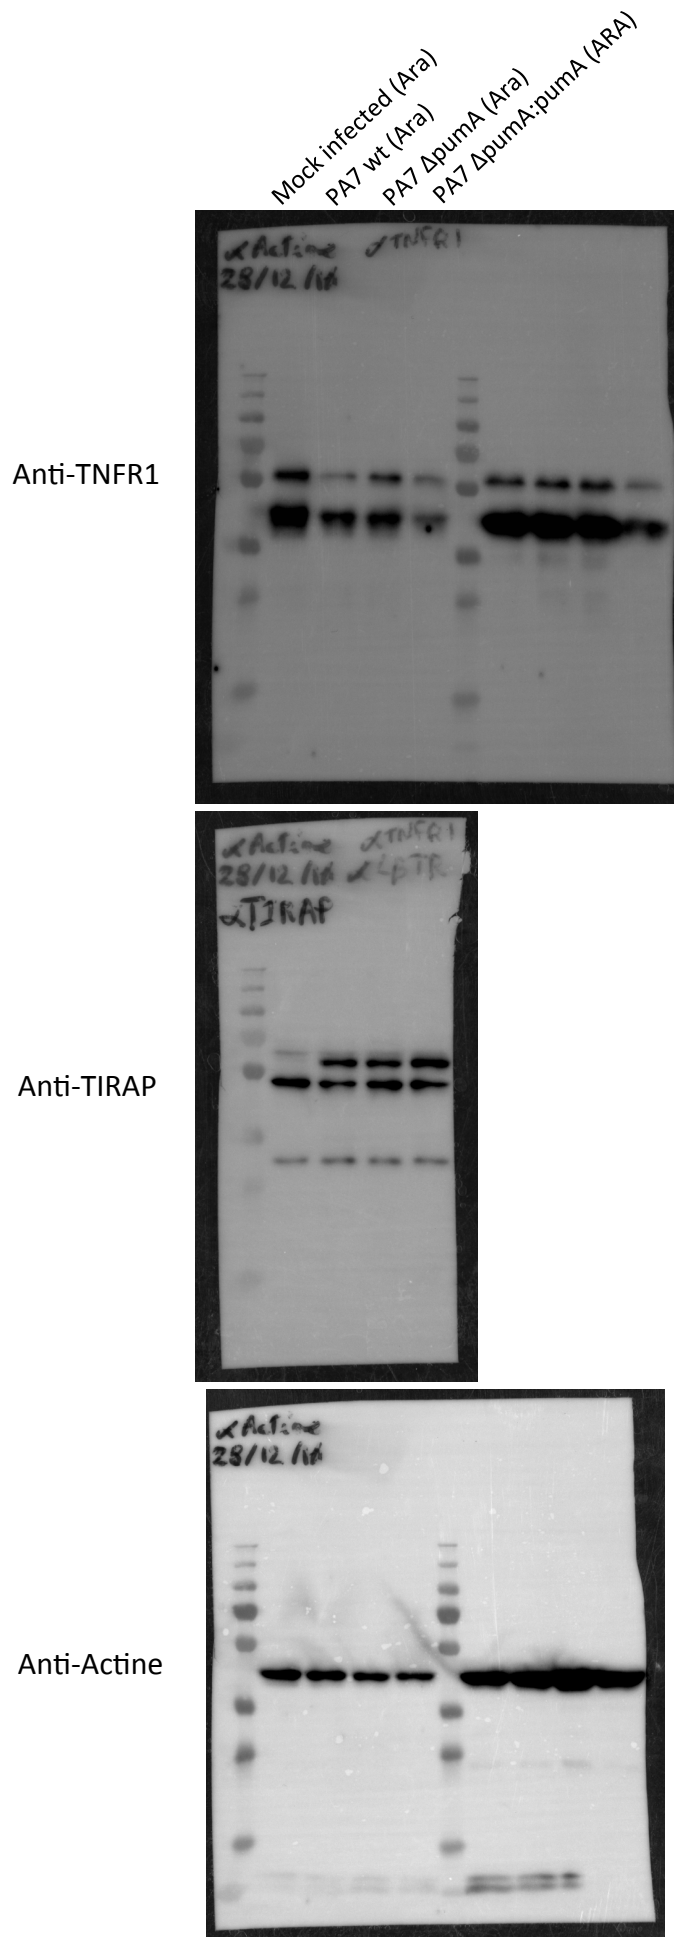

Supplement: EMBJ-36-1869-s006.pdf [file EMBJ-36-1869-s006.pdf]
